# Supplementary material
Source: PubMed Central journal article supplement (PMC4512193)
Supplement: supp_mcv090_aob-15177-s01.pdf [file supp_mcv090_aob-15177-s01.pdf]

## SUPPLEMENTARY DATA

Table S1. Effects of aluminum at different concentrations on rice growth in the 3-week (long-term) experiment.

| [Al <sup>3+</sup> ]<br>( $\mu$ M) | {Al <sup>3+</sup> } <sub>b</sub><br>( $\mu$ M) | {Al <sup>3+</sup> } <sub>0<sup>o</sup></sub><br>( $\mu$ M) | Root dry weight<br>(mg plant <sup>-1</sup> ) | Root length<br>(cm plant <sup>-1</sup> ) | Shoot dry weight<br>(mg plant <sup>-1</sup> ) | Shoot height<br>(cm plant <sup>-1</sup> ) |
|-----------------------------------|------------------------------------------------|------------------------------------------------------------|----------------------------------------------|------------------------------------------|-----------------------------------------------|-------------------------------------------|
| 0                                 | 0                                              | 0                                                          | 17.99±1.02 a                                 | 18.25±0.90 a                             | 80.00±2.50 a                                  | 34.63±1.07 a                              |
| 200                               | 41.8                                           | 18.6                                                       | 17.31±0.60 a                                 | 16.98±1.02 a                             | 76.67±1.44 ab                                 | 34.50±1.51 a                              |
| 500                               | 129.5                                          | 19.2                                                       | 17.13±0.79 a                                 | 14.92±0.84 b                             | 75.00±3.82 bc                                 | 33.17±1.70 a                              |
| 1000                              | 273.1                                          | 19.1                                                       | 16.58±0.61 a                                 | 14.75±0.25 b                             | 68.33±2.89 c                                  | 31.08±1.56 b                              |

Rice seedlings (11 days old) were grown in nutrient solution with 0, 200, 500, or 1,000  $\mu$ M Al for 3 weeks. {Al<sup>3+</sup>}<sub>b</sub>, Al activity in bulk solution; {Al<sup>3+</sup>}<sub>0<sup>o</sup></sub>, Al activity at cell membrane surface. These were calculated by G-C-S model.

The values of root length, shoot height and dry weight are mean  $\pm$  s.d. ( $n=12$ ). Different letters indicate significant differences among treatments ( $P < 0.05$ , Tukey's test).
